# Supplementary material for: One Year of Evidence on Mental Health Disorders in China during the COVID-19 Crisis - A Systematic Review and Meta-Analysis
Source: bioRxiv or medRxiv preprint supplement (doi:10.1101/2021.02.01.21250929), 2021-04-30
Supplement: Supplementary file [file media-2.pdf]

## Supplementary Materials

**Table S1: The search string used in this systematic review and meta-analysis**  
(Nov 17, 2019 - Nov 16, 2020)

| Search            | Search topic           | Search keywords (titles, abstracts, and subject headings) with Boolean operators                                                                                                                                                                                                                                                   |
|-------------------|------------------------|------------------------------------------------------------------------------------------------------------------------------------------------------------------------------------------------------------------------------------------------------------------------------------------------------------------------------------|
| 1                 | Exposure/<br>Context   | "coronavirus" OR "SARS-COV-2" OR "COVID-19" OR "2019nCoV" OR "2019-nCoV"                                                                                                                                                                                                                                                           |
| 2                 | Outcome of<br>interest | "depressi*" OR "anxi*" OR "insomnia" OR "sleep disorder" OR "sleep issue" OR "sleep problem" OR "PTSD" OR "distress disorder" OR "distress symptom" OR "distress issue" OR "distress problem" OR "mental disorder" OR "mental issue" OR "mental problem" OR "psychiatric disorder" OR "psychiatric issue" OR "psychiatric problem" |
| 3                 | Language               | English                                                                                                                                                                                                                                                                                                                            |
| Overall<br>search |                        | 1 AND 2 AND 3                                                                                                                                                                                                                                                                                                                      |

**Table S2. The characteristics of the individual studies included**

| Authors, year         | Population | Sample size | Wuhan vs. Not | Female proportion | Outcome (%) |             |             |      |              |      | Instrument               | Outcome Severity                            |
|-----------------------|------------|-------------|---------------|-------------------|-------------|-------------|-------------|------|--------------|------|--------------------------|---------------------------------------------|
|                       |            |             |               |                   | ANX         | DEP         | DIS         | GPS  | INS          | PTSD |                          |                                             |
| An et al., 2020       | GHCW       | 1103        | No            | 90.7              | NA          | 5.3         | NA          | NA   | NA           | NA   | PHQ-9                    | Severe                                      |
| Ben-Ezra et al., 2020 | GP         | 1134        | No            | 53.5              | NA          | NA          | NA          | 19.1 | NA           | NA   | K-6                      | Moderate                                    |
| Cai et al., 2020      | FHCW       | 348, 343    | Yes           | 96.5<br>97.4      | 16.4<br>4.6 | 21.8<br>9.2 | 14.7<br>6.1 | NA   | 33.3<br>19.1 | NA   | GAD-7, PHQ-9, ISI, IES-R | Moderate                                    |
|                       | GHCW       | 361<br>278  |               |                   | 4.7<br>7.6  | 9.0<br>12.8 | 9.0<br>13.7 | NA   | 16.9<br>21.3 | NA   |                          |                                             |
| Cao et al., 2020      | FHCW       | 37          | Yes           | 78.4              | NA          | 18.9        | NA          | NA   | NA           | NA   | PHQ-9                    | Moderate                                    |
| Chen et al., 2020a    | GHCW       | 105         | No            | 90.5              | 1.9         | 3.8         | NA          | NA   | NA           | NA   | SAS, SDS                 | Severe                                      |
| Chen et al., 2020b    | GP         | 1921        | No            | NA                | 0.8         | 0.0         | NA          | NA   | NA           | NA   | SAS                      | Severe                                      |
| Chen et al., 2020c    | GHCW       | 422         | Yes           | 44.6              | NA          | 3.8         | NA          | NA   | 71.6         | NA   | SDS<br>IES-R             | Mild (DEP)<br>Moderate (PTSD)               |
|                       | GP         | 1071        |               |                   | NA          | 2.9         | NA          | NA   | 55.8         | NA   |                          |                                             |
| Chen et al., 2020d    | FHCW       | 95          | No            | 74.5<br>59.7      | 8.5         | 8.5         | 1.1         | NA   | 14.9         | NA   | GAD-7, PHQ-9, ISI, PCL-C | Moderate (PTSD)<br>Severe (ANX, DEP, & INS) |
|                       | GHCW       | 77          |               |                   | 0.0         | 1.3         | 0.0         | NA   | 3.0          | NA   |                          |                                             |
| Chen et al., 2020e    | GHCW       | 902         | No            | 68.6              | 16.6        | 18.3        | NA          | NA   | NA           | NA   | GAD-7, PHQ-9             | Moderate                                    |
| Cheng et al., 2020    | GHCW       | 534         | No            | 82.4              | 0.7         | NA          | 30.0        | NA   | NA           | NA   | SAS                      | Moderate (INS)<br>Severe (ANX)              |
| Choi et al., 2020     | GP         | 500         | No            | 54.8              | 14.0        | 7.0         | NA          | NA   | NA           | NA   | GAD-7, PHQ-9             | Moderate (ANX)<br>Severe (DEP)              |
| Dai et al., 2020      | GHCW       | 4357        | No            | 76.8              | NA          | NA          | NA          | 39.1 | NA           | NA   | GHQ-12                   | Moderate                                    |
| Dong et al., 2020     | FHCW       | 4618        | No            | 83.7              | NA          | NA          | NA          | 24.2 | NA           | NA   | HEI                      | Moderate                                    |
| Du et al., 2020       | FHCW       | 134         | Yes           | 39.4              | 20.1        | 12.7        | NA          | NA   | NA           | NA   | BAI, BDI-II              | Mild                                        |
| Elhai et al., 2020    | GP         | 908         | No            | 82.8              | 2.6         | 3.7         | NA          | NA   | NA           | NA   | GAD-7, DASS-21           | Severe                                      |
| Fang, 2020            | GP         | 191         | Yes           | 60.2              | NA          | 6.8         | NA          | NA   | NA           | NA   | PHQ-9                    | Severe                                      |
| Feng, 2020            | GP         | 671         | No            | 53.9              | 3.9         | 12.2        | NA          | NA   | 10.4         | NA   | GAD-7, PHQ-2, PC-PTSD    | Moderate (DEP, PTSD)<br>Severe (ANX)        |
| Fong et al., 2020     | GP         | 590         | No            | 63.2              | NA          | 15.3        | NA          | NA   | NA           | NA   | PHQ-9,                   | Severe                                      |
| Fu et al., 2020       | GP         | 1242        | Yes           | 69.7              | 27.5        | 29.3        | 30.0        | NA   | NA           | NA   | GAD-7, PHQ-9<br>AIS      | Mild (ANX & DEP)<br>Moderate (INS)          |
| Gao et al., 2020      | GP         | 4872        | No            | 67.7              | 22.6        | 48.3        | NA          | NA   | NA           | NA   | GAD-7, WHO-5             | Moderate                                    |

|                     |      |       |     |       |              |              |              |      |       |      |                          |                                     |
|---------------------|------|-------|-----|-------|--------------|--------------|--------------|------|-------|------|--------------------------|-------------------------------------|
| Guo et al., 2020a   | FHCW | 3351  | No  | 74.8  | 2.2          | 2.5          | NA           | NA   | NA    | NA   | SAS, SDS                 | Severe                              |
|                     | GHCW | 7767  |     |       | 0.8          | 1.2          | NA           | NA   | NA    | NA   |                          |                                     |
| Guo et al., 2020b   | GP   | 2441  | No  | 52.5  | NA           | 72.6         | 20.6         | NA   | 79.6  | NA   | CES-D-20, PSQI, PCL-5    | Moderate                            |
| Han et al., 2020    | FHCW | 21199 | No  | 98.6  | 0.8          | 1.3          | NA           | NA   | NA    | NA   | SAS, SDS                 | Severe                              |
| Hong et al., 2020   | FHCW | 4692  | No  | 96.9  | 8.1          | 9.4          | NA           | NA   | NA    | NA   | GAD-7, PHQ-9             | Moderate                            |
| Hou et al., 2020    | GP   | 3063  | No  | 56.3  | 13.3         | 14.1         | NA           | NA   | NA    | NA   | GAD-2, PHQ-2             | Moderate                            |
| Hu et al., 2020a    | FHCW | 645   | No  | 75.0  | 39.0         | 33.0         | NA           | NA   | NA    | NA   | GAD-7, PHQ-9             | Mild                                |
| Hu et al., 2020b    | FHCW | 2014  | Yes | 87.1  | 3.3          | 1.1          | NA           | NA   | NA    | NA   | SAS, SDS                 | Severe                              |
| Huang et al., 2020a | GP   | 6261  | No  | 57.3  | 4.9          | 8.0          | NA           | NA   | NA    | NA   | SAS, PHQ-9               | Moderate (ANX)<br>Severe (DEP)      |
| Huang et al., 2020b | FHCW | 364   | No  | 58.8  | 0.8          | NA           | NA           | NA   | NA    | NA   | SAS                      | Severe                              |
| Huang et al., 2020c | GP   | 1172  | No  | 69.3  | 33.0         | NA           | 24.7         | NA   | NA    | NA   | GAD-7, ISI               | Mild (ANX)<br>Moderate (INS)        |
| Jin et al., 2020    | GP   | 143   | Yes | NA    | 1.4          | NA           | NA           | NA   | NA    | NA   | SAS                      | Severe                              |
|                     |      | 175   | No  |       | 0.0          | NA           | NA           | NA   | NA    | NA   |                          |                                     |
| Juan et al., 2020   | FHCW | 416   | No  | 70.6  | 4.6          | 6.4          | NA           | NA   | NA    | NA   | GAD-7, PHQ-9             | Moderate                            |
| Lai et al., 2020    | GHCW | 1257  | No  | 76.7  | 5.3          | 6.2          | 1.0          | 10.5 | NA    | NA   | GAD-7, PHQ-9, ISI, IES-R | Severe                              |
| Lam et al., 2020    | FHCW | 932   | No  | 75.2  | NA           | 11.2         | NA           | NA   | NA    | NA   | PHQ-9                    | Severe                              |
| Lei et al., 2020    | GP   | 1593  | No  | 61.3  | 0.4          | 1.1          | NA           | NA   | NA    | NA   | SAS, SDS                 | Severe                              |
| Leng et al.2020     | FHCW | 90    | Yes | 72.2  | 5.6          | NA           | NA           | NA   | NA    | NA   | PCL-C                    | Mild                                |
| Li et al., 2020a    | FHCW | 219   | Yes | 78.1  | NA           | NA           | 58.9         | NA   | NA    | 13.2 | SRQ-20, AIS              | Moderate                            |
|                     | GHCW | 729   | No  | 76.4  | NA           | NA           | 25.0         | 8.64 | 24.97 | 8.6  |                          |                                     |
| Li et al., 2020b    | GHCW | 4396  | Yes | 100.0 | 25.2         | 14.2         | NA           | NA   | NA    | NA   | GAD-7, PHQ-9             | Moderate                            |
| Li et al., 2020c    | GP   | 3637  | No  | 63.0  | 16.1<br>27.5 | 22.7<br>31.2 | 26.2<br>33.7 | NA   | NA    | NA   | GAD-7, PHQ-9<br>ISI      | Mild                                |
| Li et al., 2020d    | GP   | 1109  | No  | 43.9  | NA           | NA           | NA           | NA   | 67.9  | NA   | IES-R                    | Moderate                            |
| Li et al., 2020e    | GHCW | 908   | No  | 75.6  | 0.8          | 1.2          | NA           | NA   | NA    | NA   | SAS, SDS                 | Severe                              |
| Li et al., 2020f    | GP   | 88611 | No  | 76.9  | 13.67        | NA           | NA           | NA   | NA    | NA   | GAD-7                    | Moderate                            |
| Li et al., 2020g    | FHCW | 176   | Yes | 77.3  | 50.0         | NA           | NA           | NA   | NA    | NA   | HAMA                     | Moderate                            |
| Li et al., 2020h    | FHCW | 225   | Yes | 72.0  | 35.6         | 46.7         | NA           | NA   | 31.6  | NA   | DASS-21, IES-R           | Mild (ANX & DEP)<br>Moderate (PTSD) |

|                    |      |       |     |      |      |      |             |    |      |      |                      |                                         |
|--------------------|------|-------|-----|------|------|------|-------------|----|------|------|----------------------|-----------------------------------------|
| Li et al., 2020i   | FHCW | 356   | No  | 86.2 | NA   | NA   | NA          | NA | 61.8 | NA   | PCL-5                | Moderate                                |
| Li et al., 2020j   | FHCW | 150   | No  | 62.7 | 39.3 | 44.7 | NA          | NA | NA   | NA   | HAMA, HAMD           | Moderate                                |
| Liang et al., 2020 | FHCW | 168   | No  | 79.2 | 19.6 | 29.2 | 13.1        | NA | NA   | NA   | GAD-7, PHQ-9, ISI    | Moderate                                |
|                    | GP   | 1835  |     | 74.4 | 10.8 | 23.1 | 8.6         | NA | 8.61 | NA   |                      |                                         |
| Lin et al., 2020a  | GHCW | 2316  | No  | NA   | 41.1 | 46.9 | 32.0        | NA | NA   | NA   | GAD-7, PHQ-9, ISI    | Mild                                    |
| Lin et al., 2020b  | GP   | 5461  | No  | 70.1 | 9.2  | 10.8 | 2.7,<br>1.6 | NA | NA   | NA   | GAD-7, PHQ-9, ISI    | Severe                                  |
| Liu et al., 2020a  | GHCW | 512   | No  | 84.6 | 0.8  | NA   | NA          | NA | NA   | NA   | SAS                  | Severe                                  |
| Liu et al., 2020b  | GP   | 14592 | No  | 68.4 | 6.6  | 10.1 | NA          | NA | NA   | 3.2  | GAD-7, PHQ-9, SRQ-20 | Severe                                  |
| Liu et al., 2020c  | GP   | 285   | Yes | 54.4 | NA   | NA   | NA          | NA | 7.0  | NA   | PCL-5                | Moderate                                |
| Liu et al., 2020d  | GHCW | 4976  | No  | 82.3 | 2.2  | 2.3  | NA          | NA | NA   | 15.9 | SAS, SDS, SRQ-20     | Moderate (GPS)<br>Severe (ANX & DEP)    |
| Liu et al., 2020e  | GP   | 4991  | No  | 50.4 | 1.50 | NA   | NA          | NA | NA   | NA   | SAS                  | Severe                                  |
| Liu et al., 2020f  | GP   | 574   | No  | 57.7 | NA   | 0.7  | NA          | NA | NA   | NA   | SDS                  | Severe                                  |
| Liu et al., 2020g  | FHCW | 317   | No  | 80.2 | 12.7 | 18.9 | NA          | NA | NA   | NA   | GAD-7, PHQ-9         | Moderate                                |
|                    | GHCW | 719   |     |      | 13.6 | 18.2 | NA          | NA | NA   | NA   |                      |                                         |
| Liu et al., 2020h  | FHCW | 742   | No  | 85.5 | 4.0  | 2.1  | NA          | NA | NA   | NA   | DASS-21              | Severe                                  |
|                    | GHCW | 1289  |     |      | 1.2  | 1.0  | NA          | NA | NA   | NA   |                      |                                         |
| Lu et al., 2020a   | GHCW | 2042  | No  | 77.6 | 2.9  | 0.3  | NA          | NA | NA   | NA   | HAMA, HAMD           | moderate (ANX)<br>severe (DEP)          |
|                    | GP   | 257   |     |      | 1.6  | 0.0  | NA          | NA | NA   | NA   |                      |                                         |
| Lu et al., 2020b   | GHCW | 1848  | No  | 63.0 | NA   | 18.8 | NA          | NA | NA   | NA   | CES-D-9              | Moderate                                |
| Lu et al., 2020c   | FHCW | 382   | Yes | 61.8 | 7.6  | 9.9  | NA          | NA | 6.8  | NA   | GAD-7, PHQ-9, PCL-C  | Moderate (PTSD)<br>Severe (ANX and DEP) |
|                    | GP   | 1035  |     |      | 91.4 | 6.3  | 6.8         | NA | NA   | 4.5  |                      |                                         |
| Mi et al., 2020    | GHCW | 1029  | No  | 61.6 | 6.6  | 13.3 | NA          | NA | NA   | NA   | GAD-2, HQ-2          | Moderate                                |
| Ni et al., 2020a   | GHCW | 214   | Yes | 60.8 | 23.8 | 19.2 | NA          | NA | NA   | NA   | GAD-2, PHQ-2         | Moderate                                |
|                    | GP   | 1577  |     |      | 68.8 | 22.0 | 19.2        | NA | NA   | NA   |                      |                                         |
| Ni et al., 2020b   | GP   | 2551  | No  | 68.9 | 1.8  | 14.9 | NA          | NA | NA   | NA   | GAD-7, PHQ-2         | Moderate (DEP)<br>Severe (ANX)          |
| Ning et al., 2020  | GHCW | 612   | No  | 72.9 | 16.3 | 25.0 | NA          | NA | NA   | NA   | SAS, SDS             | Mild                                    |
| Pan et al., 2020a  | GHCW | 194   | Yes | 81.8 | 3.6  | 5.2  | NA          | NA | NA   | NA   | GAD-7, PHQ-9         | Moderate                                |
| Pan et al., 2020b  | GP   | 3035  | No  | 46.9 | NA   | 5.6  | NA          | NA | NA   | NA   | PHQ-9                | Moderate                                |

|                        |      |       |     |       |      |      |      |      |       |    |                      |                                              |
|------------------------|------|-------|-----|-------|------|------|------|------|-------|----|----------------------|----------------------------------------------|
| Qi et al., 2020        | FHCW | 801   | No  | 79.9  | NA   | NA   | 78.4 | NA   | NA    | NA | PSQI                 | Moderate                                     |
|                        | GHCW | 505   |     | 81.2  | NA   | NA   | 61.0 | NA   | 61.00 | NA |                      |                                              |
| Qian et al., 2020a     | GP   | 510   | Yes | 50.0  | 32.7 | NA   | NA   | NA   | NA    | NA | GAD-7                | Moderate                                     |
|                        |      | 501   | No  | 49.1  | 20.4 | NA   | NA   | NA   | NA    | NA |                      |                                              |
| Qian et al., 2020b     | GP   | 510   | Yes | 50.0  | 32.8 | NA   | NA   | NA   | NA    | NA | GAD-7                | Moderate                                     |
|                        |      | 501   | No  | 49.1  | 20.5 | NA   | NA   | NA   | NA    | NA |                      |                                              |
| Qiu et al., 2020       | GP   | 52730 | No  | 64.7  | NA   | NA   | NA   | 5.14 | NA    | NA | CPDI                 | Severe                                       |
| Que et al et al., 2020 | GHCW | 2285  | No  | 69.1  | 11.6 | 12.8 | 6.8  | NA   | NA    | NA | GAD-7, PHQ-9, ISI    | Moderate                                     |
| Ren et al., 2020       | GP   | 6130  | No  | 66.9  | 7.1  | 12.0 | NA   | NA   | NA    | NA | GAD-7, PHQ-9         | Moderate                                     |
| Shi et al., 2020       | FHCW | 9725  | No  | 52.1  | 11.9 | 12.8 | 7.0  | NA   | NA    | NA | GAD-7, PHQ-9         | Moderate                                     |
|                        | GP   | 46954 |     |       | 10.0 | 10.4 | 5.5  | NA   | 5.49  | NA |                      |                                              |
| Si et al., 2020        | GHCW | 863   | No  | 70.7  | 13.6 | 13.9 | NA   | NA   | 40.2  | NA | DASS-21, IES-6       | Mild (ANX & DEP)<br>Moderate (PTSD)          |
| Song et al., 2020a     | GHCW | 14825 | No  | 64.3  | NA   | 25.2 | NA   | NA   | 9.1   | NA | PCL-5, CES-D-20      | Moderate                                     |
| Song et al., 2020b     | GP   | 709   | No  | 74.2  | 12.7 | 13.5 | 20.7 | NA   | NA    | NA | GAD-7, CES-D-10, ISI | Mild (INS), Moderate<br>(ANX & DEP)          |
| Su et al., 2020        | GP   | 403   | No  | 68.5  | 5.0  | NA   | NA   | NA   | NA    | NA | GAD-7                | Severe                                       |
| Sun et al., 2020a      | GP   | 2091  | No  | 60.8  | NA   | NA   | NA   | NA   | 4.6   | NA | PCL-5                | Moderate                                     |
| Sun et al., 2020b      | FHCW | 170   | Yes | 92.4  | 1.2  | 0.0  | NA   | NA   | NA    | NA | DASS-21              | Severe                                       |
| Sun et al., 2020c      | GP   | 472   | No  | 56.4  | NA   | 75.4 | NA   | NA   | NA    | NA | CES-D-10             | Mild                                         |
| Sun et al., 2020d      | GHCW | 536   | No  | 69.0  | 9.7  | 18.8 | NA   | NA   | NA    | NA | GAD-7, PHQ-9         | Mild                                         |
| Tan et al., 2020       | GP   | 673   | No  | 25.6  | 1.3  | 0.9  | 0.4  | NA   | 10.8  | NA | DASS-21, ISI, IES-R  | Moderate (PTSD), Severe<br>(ANX, DEP, & INS) |
| Teng et al., 2020      | GHCW | 398   | No  | 75.9  | 0.3  | 4.3  | NA   | NA   | NA    | NA | SAS, PHQ-9           | Severe                                       |
| Tu et al., 2020        | GHCW | 100   | No  | 100.0 | 10.0 | 2.0  | 2.0  | NA   | NA    | NA | GAD-7, PHQ-9, PSQI   | Severe                                       |
| Wang et al., 2020a     | GP   | 600   | No  | 55.5  | 0.0  | 0.3  | NA   | NA   | NA    | NA | SAS, SDS             | Severe                                       |
| Wang et al., 2020b     | GHCW | 123   | Yes | 90.0  | 7.3  | 25.2 | 38.2 | NA   | NA    | NA | SAS, SDS, PSQI       | Mild (ANX & DEP)<br>Moderate (INS)           |
| Wang et al., 2020c     | GHCW | 1045  | No  | 85.8  | 20.0 | 13.6 | 10.4 | NA   | NA    | NA | HADS, ISI            | Moderate                                     |
| Wang et al., 2020d     | GP   | 6437  | No  | 56.1  | NA   | NA   | 17.7 | NA   | NA    | NA | PSQI                 | Moderate                                     |
| Wang et al., 2020e     | FHCW | 274   | No  | 77.4  | NA   | NA   | 19.7 | NA   | NA    | NA | PSQI                 | Moderate                                     |

|                     |      |              |     |      |              |              |      |      |     |      |                          |                                     |
|---------------------|------|--------------|-----|------|--------------|--------------|------|------|-----|------|--------------------------|-------------------------------------|
| Wang et al., 2020f  | FHCW | 179          | No  | 52.0 | 14.5         | 5.3          | 7.3  | NA   | NA  | NA   | GAD-7, PHQ-9<br>ISI      | Severe                              |
|                     | GP   | 16066        |     |      | 2.7          | 2.0          | 3.1  | NA   | NA  | NA   |                          |                                     |
| Wang et al., 2020g  | FHCW | 661          | No  | 64.5 | 24.8         | 36.6         | 23.6 | NA   | NA  | NA   | HADS, PSQI               | Mild (ANX & DEP)<br>Moderate (INS)  |
|                     | GHCW | 853          |     |      | 22.3         | 36.6         | 17.0 | NA   | NA  | NA   |                          |                                     |
|                     | GP   | 487          |     |      | 20.1         | 31.8         | 13.3 | NA   | NA  | NA   |                          |                                     |
| Wang et al., 2020h  | FHCW | 202          | No  | 87.6 | NA           | NA           | NA   | NA   | 9.4 | NA   | PCL-C                    | Moderate                            |
| Wang et al., 2020i  | GP   | 2540<br>2543 | No  | NA   | 32.0<br>36.4 | 36.1<br>42.9 | NA   | NA   | NA  | NA   | GAD-7, PHQ-9             | Mild                                |
| Wang et al., 2020j  | FHCW | 742          | Yes | 82.5 | 38.5         | 21.7         | 15.4 | NA   | NA  | NA   | GAD-7, PHQ-9, ISI        | Mild (ANX & PTSD)<br>Moderate (DEP) |
|                     | GHCW | 1155         |     |      | 19.8         | 10.7         | 6.1  | NA   | NA  | NA   |                          |                                     |
| Wu et al., 2020a    | GP   | 24789        | No  | 46.3 | 3.6          | 3.1          | NA   | NA   | NA  | NA   | HADS                     | Severe                              |
| Wu et al., 2020b    | GHCW | 304          | No  | 68.1 | NA           | NA           | NA   | 14.1 | NA  | NA   | K-6                      | Moderate                            |
| Wu et al., 2020c    | GP   | 104          | Yes | 57.7 | NA           | NA           | NA   | NA   | 9.4 | NA   | PCL-5                    | Moderate                            |
|                     |      | 330          | No  | 67.3 | NA           | NA           | NA   | NA   | 7.2 | 7.20 |                          |                                     |
| Xiao et al., 2020   | GHCW | 958          | No  | 67.2 | 54.1         | 57.3         | NA   | NA   | NA  | NA   | HADS                     | Mild                                |
| Xu et al., 2020     | GHCW | 8817         | No  | 78.0 | 0.0          | 3.2          | NA   | NA   | NA  | NA   | GAD-7, PHQ-9             | Severe                              |
| Xing et al., 2020   | FHCW | 309          | No  | 97.4 | 2.3          | 0.6          | NA   | NA   | NA  | NA   | SAS, SDS                 | Severe                              |
| Xiong et al., 2020  | GHCW | 231          | No  | 97.3 | 3.6          | 1.8          | NA   | NA   | NA  | NA   | GAD-7, PHQ-9             | Severe                              |
| Yang et al., 2020a  | GHCW | 449          | No  | NA   | 29.2         | NA           | NA   | NA   | NA  | NA   | SAS                      | Mild                                |
| Yang et al., 2020b  | GP   | 2410         | No  | 49.2 | NA           | NA           | 14.9 | NA   | NA  | NA   | PSQI                     | Mild                                |
| Yin et al., 2020a   | GP   | 8151         | No  | 57.7 | 6.7          | 13.5         | NA   | NA   | NA  | NA   | GAD-7, PHQ-9             | Moderate                            |
| Yin et al., 2020b   | GHCW | 371          | No  | 61.5 | NA           | NA           | NA   | NA   | 3.8 | NA   | PCL-5                    | Moderate                            |
| Ying et al., 2020   | GP   | 845          | No  | 47.3 | 33.7         | 29.4         | NA   | NA   | NA  | NA   | GAD-7, PHQ-9             | Mild                                |
| Yu et al., 2020a    | GP   | 1588         | No  | 66.9 | NA           | NA           | NA   | 22.8 | NA  | NA   | K-6                      | Moderate                            |
| Yu et al., 2020b    | GP   | 1138         | No  | 65.6 | NA           | NA           | 29.9 | NA   | NA  | NA   | ISI                      | Moderate                            |
| Yu et al., 2020c    | FHCW | 290          | No  | 64.1 | 7.3          | NA           | NA   | NA   | NA  | NA   | GAD-7                    | Severe                              |
| Zhan et al., 2020a  | FHCW | 2667         | Yes | 97.0 | 39.8         | 54.7         | NA   | NA   | NA  | NA   | GAD-7, PHQ-9             | Moderate                            |
| Zhan et al., 2020b  | FHCW | 1794         | Yes | 97.0 | NA           | NA           | 52.8 | NA   | NA  | NA   | AIIS                     | Moderate                            |
| Zhang et al., 2020a | GHCW | 1563         | No  | 82.5 | 44.7         | 50.7         | 36.1 | 73.4 | NA  | NA   | GAD-7, PHQ-9, ISI, IES-R | Mild                                |
| Zhang et al., 2020b | GP   | 98           | No  | 65.3 | 16.3         | 14.3         | NA   | NA   | NA  | NA   | GAD-7, PHQ-9             | Severe                              |

|                     |      |        |     |      |      |       |      |     |      |      |                      |                                              |
|---------------------|------|--------|-----|------|------|-------|------|-----|------|------|----------------------|----------------------------------------------|
| Zhang et al., 2020c | GP   | 369    | No  | 45.0 | NA   | NA    | NA   | 0.0 | NA   | NA   | K-6                  | Severe                                       |
| Zhang et al., 2020d | GHCW | 927    | No  | 73.1 | 13.0 | 12.2  | 38.4 | NA  | NA   | NA   | GAD-2, PHQ-2, ISI    | Mild (INS)<br>Moderate (ANX & DEP)           |
|                     | GP   | 1255   |     | 57.6 | 8.5  | 9.5   | 30.5 | NA  | NA   | NA   |                      |                                              |
| Zhang et al., 2020e | GP   | 263    | No  | 59.7 | NA   | NA    | NA   | NA  | 7.6  | NA   | IES-R                | Moderate                                     |
| Zhang et al., 2020f | FHCW | 966    | No  | 76.4 | 10.7 | 17.3  | NA   | NA  | NA   | NA   | GAD-7, PHQ-9         | Moderate                                     |
| Zhang et al., 2020g | FHCW | 421    | Yes | 85.1 | 14.6 | 16.2  | 2.8  | NA  | 22.6 | NA   | HADS, ISI<br>PCL-C   | Moderate (ANX, DEP, &<br>PTSD), Severe (INS) |
|                     | GP   | 221    |     |      |      |       | NA   | NA  | 17.7 | NA   |                      |                                              |
| Zhang et al., 2020h | GP   | 1342   | No  | 62.7 | NA   | 13.60 | NA   | NA  | NA   | NA   | PHQ-9                | Moderate                                     |
| Zhang et al., 2020i | GP   | 123768 | No  | 29.4 | 0.3  | 0.1   | NA   | NA  | NA   | NA   | SAS, SDS             | Severe                                       |
| Zhang et al., 2020j | FHCW | 269    | No  | 47.1 | 5.6  | 4.8   | 7.8  | NA  | NA   | NA   | GAD-7, PHQ-9, ISI    | Severe                                       |
|                     | GP   | 2640   |     |      | 4.4  | 3.1   | 5.6  | NA  | NA   | NA   |                      |                                              |
| Zhao et al., 2020a  | FHCW | 972    | No  | 62.7 | 16.9 | 10.3  | 11.2 | NA  | NA   | NA   | GAD-7, PHQ-9, ISI    | Moderate                                     |
| Zhao et al., 2020b  | GP   | 1501   | No  | NA   | 15.8 | 14.8  | NA   | NA  | NA   | NA   | GAD-2, PHQ-2         | Moderate                                     |
| Zhao et al., 2020c  | GP   | 1630   | No  | NA   | 0.8  | NA    | 36.4 | NA  | NA   | NA   | SAS, PSQI            | Mild, Severe                                 |
| Zhou et al., 2020a  | FHCW | 1931   | No  | 12.0 | NA   | NA    | 18.4 | NA  | NA   | NA   | PSQI                 | Moderate                                     |
| Zhou et al., 2020b  | FHCW | 606    | No  | 81.2 | 45.4 | 57.6  | 32.0 | NA  | NA   | NA   | GAD-7, PHQ-9, ISI    | Mild                                         |
|                     | GP   | 1099   |     | 69.4 | 33.8 | 47.6  | 25.1 | NA  | NA   | NA   |                      |                                              |
| Zhu et al., 2020a   | GP   | 5281   | No  | 85.0 | 24.1 | 13.5  | NA   | NA  | NA   | NA   | GAD-7, PHQ-9         | Moderate                                     |
| Zhu et al., 2020b   | GHCW | 453    | No  | 94.9 | 28.6 | NA    | NA   | NA  | NA   | NA   | SAS                  | Moderate                                     |
| Zhu et al., 2020c   | FHCW | 165    | No  | 83.0 | 11.4 | 45.6  | NA   | NA  | NA   | NA   | SAS, SDS             | Mild                                         |
| Zhu et al., 2020d   | FHCW | 320    | No  | 63.7 | 19.7 | 21.3  | NA   | NA  | NA   | 12.8 | GAD-7, PHQ-9, SRQ-20 | Mild (ANX & DEP)<br>Moderate (GPS)           |
|                     | GHCW | 538    |     | 73.0 | 17.1 | 18.0  | NA   | NA  | NA   | 10.0 |                      |                                              |

Note: ANX= Anxiety, FHCW=Frontline Healthcare Worker, GHCW = General Healthcare Worker, GP = General Population, INS= INS, GPS=General psychological symptoms, DEP= Depression, DIS=DIS, NA= Not available, Mild = Above Mild, Moderate = Above Moderate, Severe =Above severe

**Table S3. The instruments of mental health disorders in the individual papers in the systematic review**

| Instrument                                                                                               | Frequency | Percent | Citation |
|----------------------------------------------------------------------------------------------------------|-----------|---------|----------|
| <b>Anxiety</b>                                                                                           | 127       | 100     |          |
| PHQ (GAD-7/GAD-2, Generalized Anxiety Disorder scale - 7-item/2-item)                                    | 77        | 60.6    | 157 158  |
| SAS (Self-rating Anxiety Scale)                                                                          | 30        | 23.6    | 159      |
| HADS (Hospital Anxiety Depression Scale)                                                                 | 7         | 5.5     | 160      |
| DASS-21 (Depression Anxiety Stress Scale)                                                                | 6         | 4.7     | 161      |
| HAMA (Hamilton Anxiety Rating Scale)                                                                     | 6         | 4.7     | 162      |
| BAI (Beck Anxiety Inventory)                                                                             | 1         | 0.8     | 163      |
| <b>Depression</b>                                                                                        | 128       | 100     |          |
| PHQ (PHQ-9/PHQ-2, The Patient Health Questionnaire depression scale - 9-item/2-item)                     | 81        | 63.3    | 158 164  |
| SDS (Self-rating Depression Scale)                                                                       | 17        | 13.3    | 165 166  |
| CES-D (CES-D-20/9/10, The Center for Epidemiologic Studies Depression Scale – 20 items/9 items/10 items) | 9         | 7.0     | 167      |
| DASS-21 (Depression Anxiety Stress Scale)                                                                | 7         | 5.5     | 161      |
| HADS (Hospital Anxiety Depression Scale)                                                                 | 7         | 5.5     | 160      |
| HAMD (Hamilton Depression Scale)                                                                         | 5         | 3.9     | 168      |
| BDI-II                                                                                                   | 1         | 0.8     | 169      |
| WHO-5                                                                                                    | 1         | 0.8     | 170      |
| <b>Distress</b>                                                                                          | 9         | 100     |          |
| K-6 (the six-item Kessler mental distress scale)                                                         | 4         | 44.4    | 171      |
| IES-R (Impact of Event Scale - Revised)                                                                  | 2         | 22.2    | 172      |
| CPDI (COVID-19 Peritraumatic Distress Index)                                                             | 1         | 11.1    | 50       |
| GHQ-12 (General Health Questionnaire)                                                                    | 1         | 11.1    | 22       |
| HEI (Huaxi Emotional-Distress Index)                                                                     | 1         | 11.1    | 173      |
| <b>General psychological symptoms</b>                                                                    |           |         |          |
| SRQ-20 (Self Reporting Questionnaire 20)                                                                 | 7         | 100     | 174      |
| <b>Insomnia</b>                                                                                          | 57        | 100     |          |
| ISI (Insomnia Severity Index)                                                                            | 36        | 63.2    | 175      |
| PSQI (Pittsburgh Sleep Quality Index)                                                                    | 17        | 29.8    | 176 177  |
| AIS (Athens Insomnia Scale)                                                                              | 4         | 7.0     | 178      |
| <b>PTSD</b>                                                                                              | 30        | 100     |          |
| IES-R (Impact of Event Scale – Revised)                                                                  | 12        | 40.0    | 179-181  |
| PCL-5 (the Posttraumatic Stress Disorder Checklist for DSM-5)                                            | 8         | 26.7    | 182      |
| PCL-C (Posttraumatic Stress Disorder Checklist-Civilian Version)                                         | 8         | 26.7    | 183-185  |
| IES-6 (Impact of Event Scale – 6 items)                                                                  | 1         | 3.3     | 186      |
| PC-PTSD (The Primary Care PTSD Screen for DSM-5)                                                         | 1         | 3.3     | 187      |
